# Supplementary material for: A selective, cell-permeable fluorescent probe for Al3+ in living cells
Source: Royal Society of Chemistry journal article supplement (doi:10.1039/c0ob00123f), 2010-01-01
Supplement: c0ob00123f.pdf [file c0ob00123f.pdf]

## Supporting Information

### **A Selective, Cell-Permeable Fluorescent Probe for Al<sup>3+</sup> in Living Cells**

**Lina Wang, Wenwu Qin, Xiaoliang Tang, Wei Dou, Weisheng Liu,\* Qingfeng Teng and  
Xiaojun Yao**

*Key Laboratory of Nonferrous Metal Chemistry and Resources Utilization of Gansu Province and State*

*Key Laboratory of Applied Organic Chemistry, College of Chemistry and Chemical Engineering,*

*Lanzhou University, Lanzhou 730000, P. R. China*

*E-mail: [liuws@lzu.edu.cn](mailto:liuws@lzu.edu.cn)*

## Spectroscopic data

### IR spectra of L.

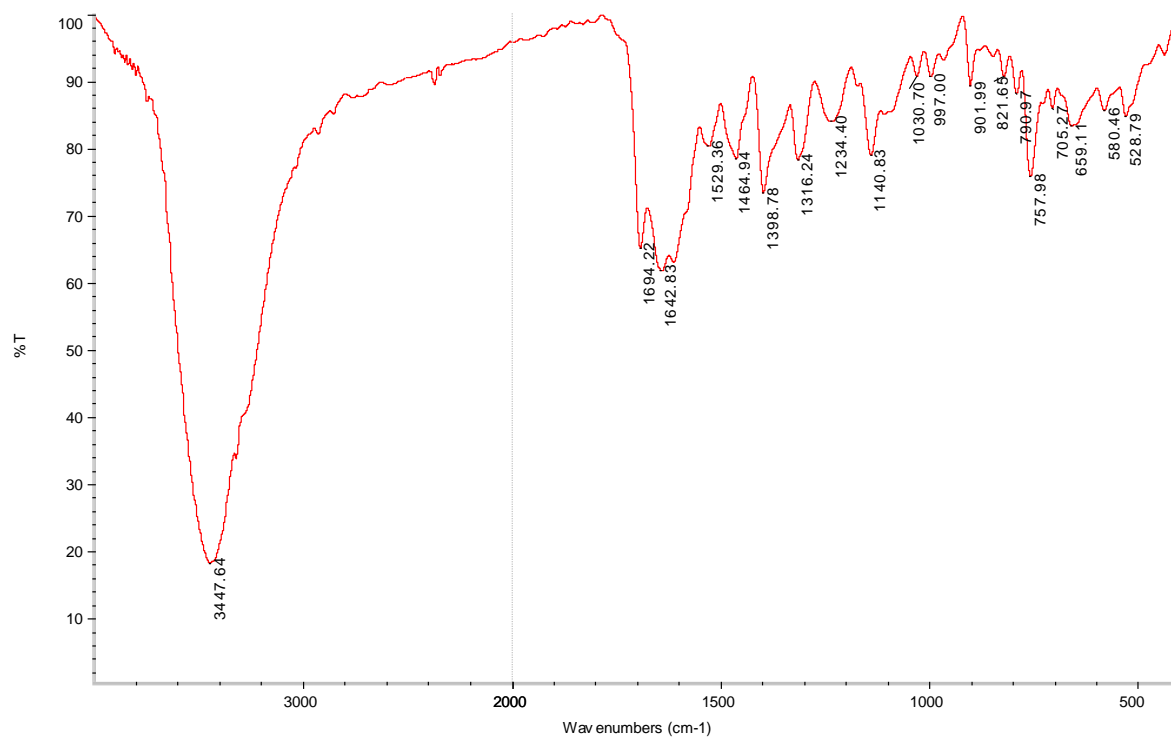

### IR spectra of complex L-Al(ClO<sub>4</sub>)<sub>3</sub>.

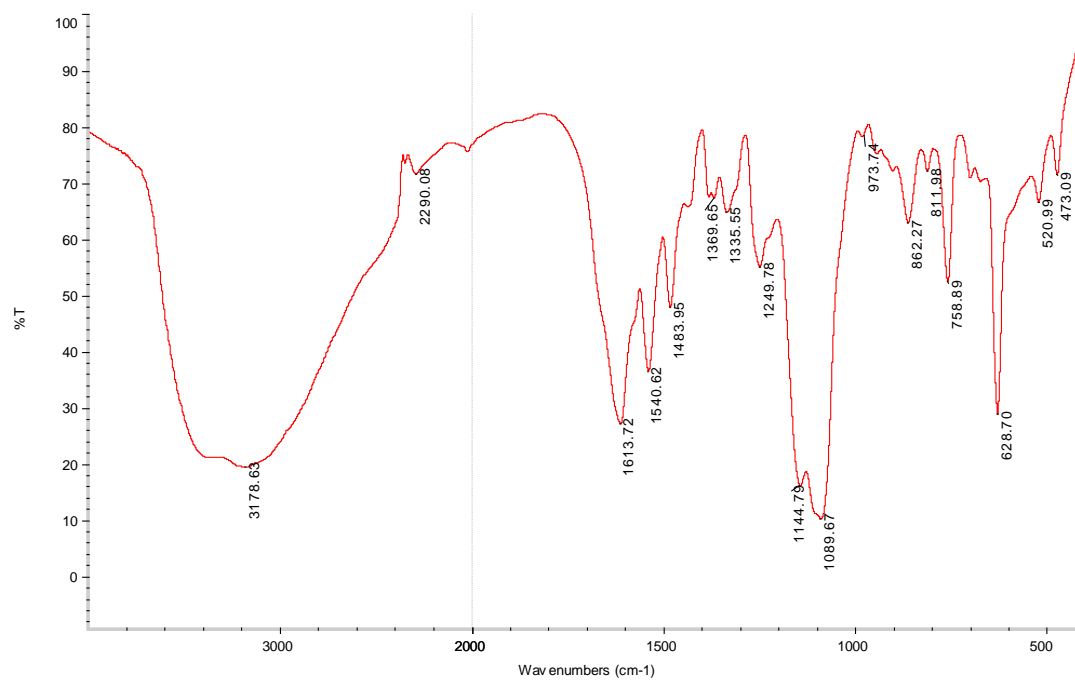

$^1\text{H}$  NMR (300MHz) of compound **L** in  $\text{DMSO-}d_6$ .

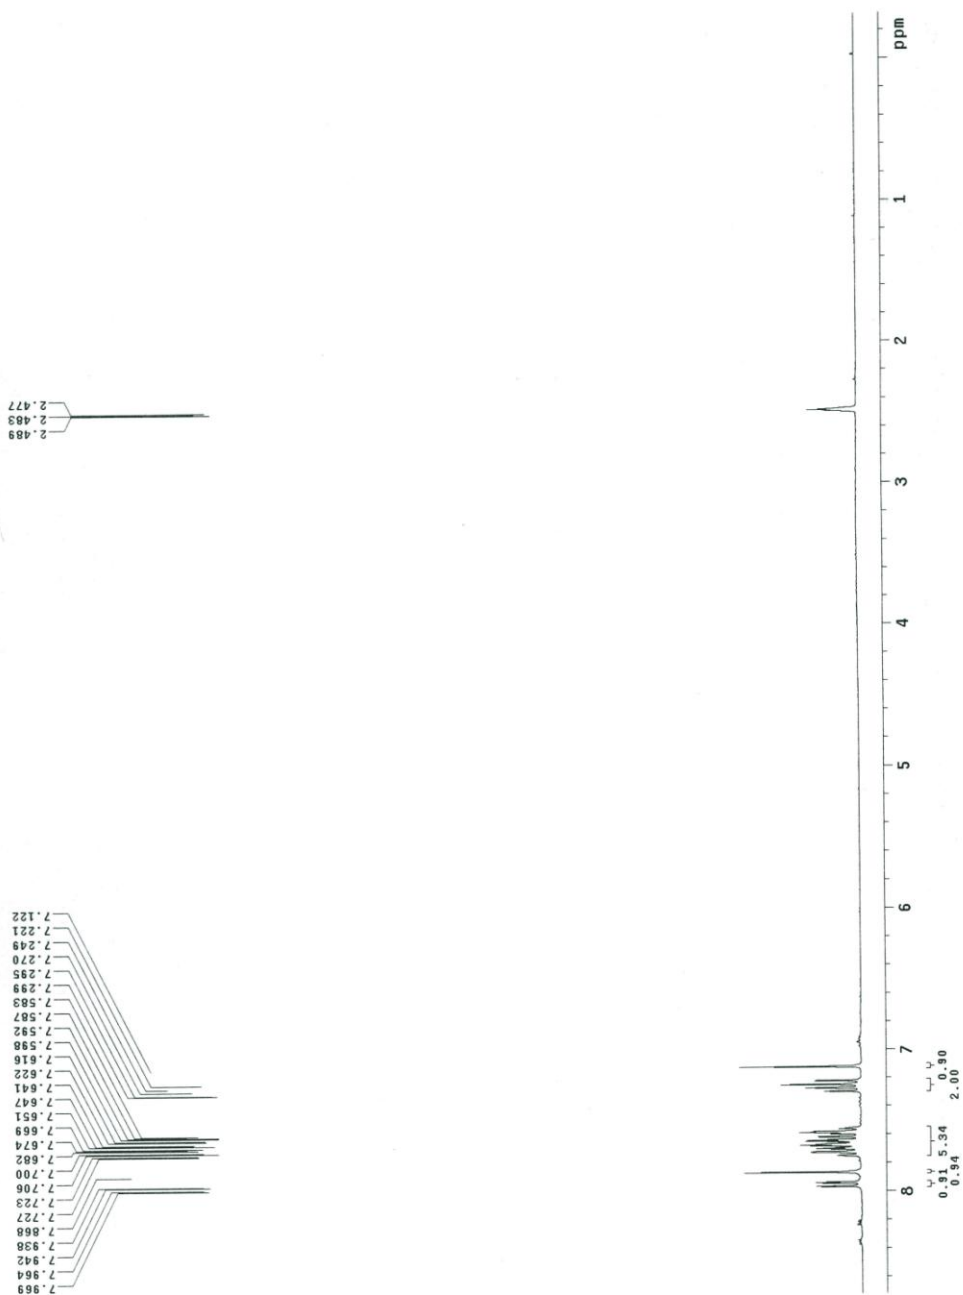

$^{13}\text{C}$  NMR (75MHz) of compound **L** in  $\text{DMSO-}d_6$ .

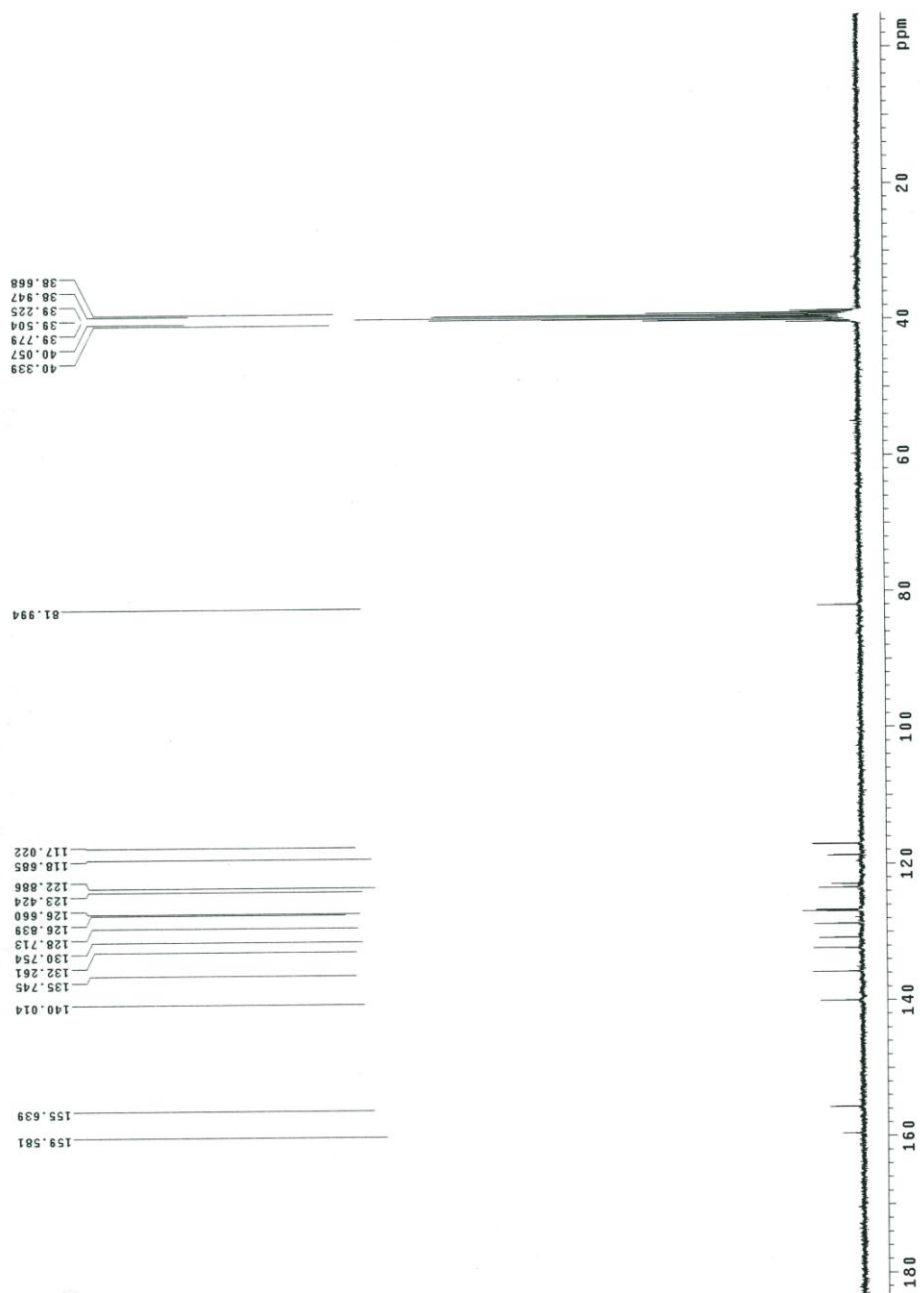

Electrospray ionization (ESI) mass spectrum of **L**.

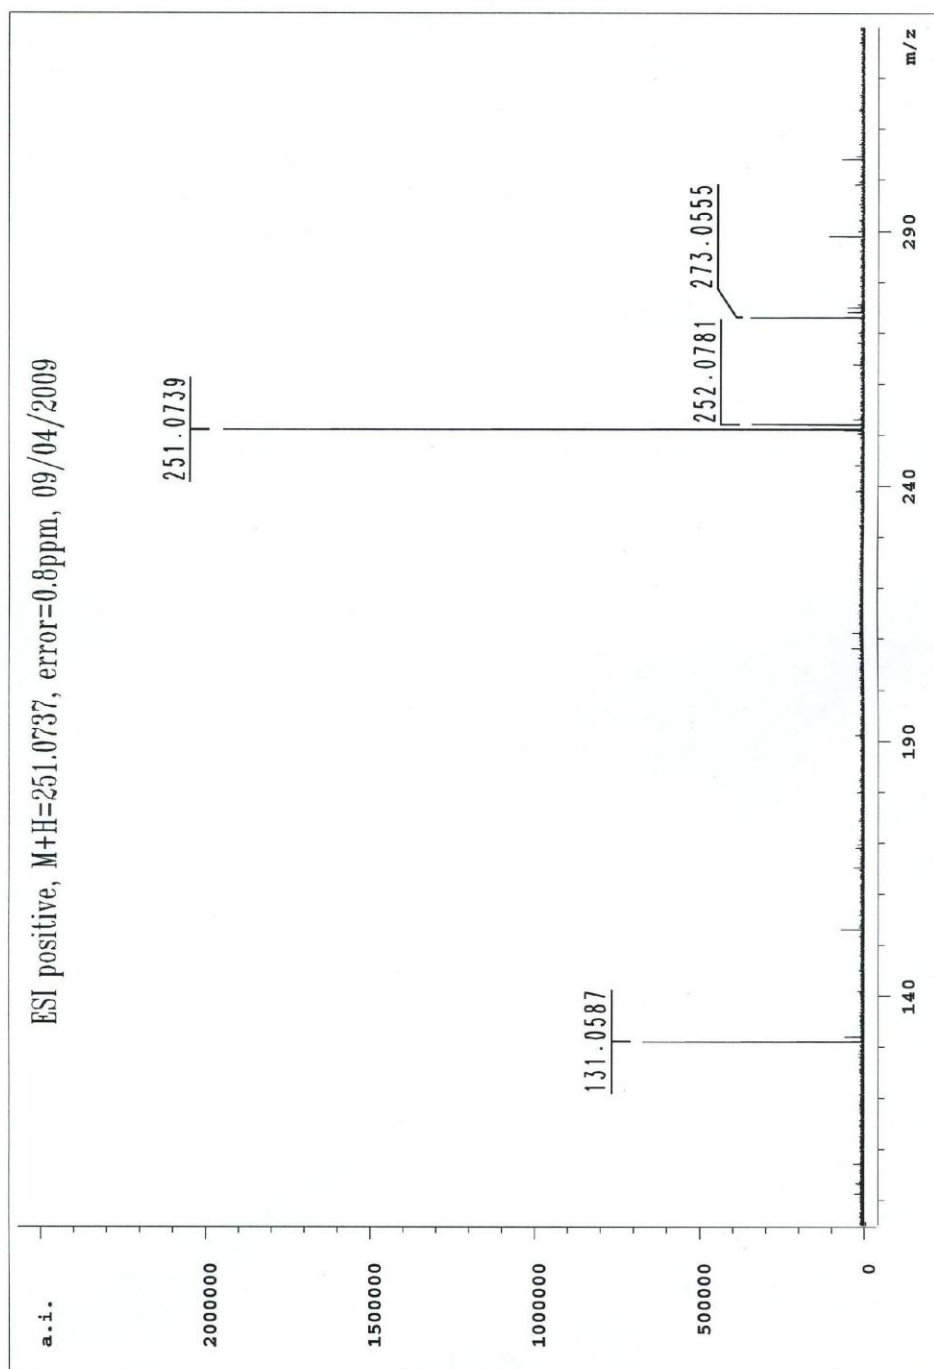

/u/data/TRAINING/wanglina0410/1/pdata/1 xspec Thu Apr 9 15:58:10 2009

Electrospray ionization (ESI) mass spectrum of  $\text{Al}(\text{L})_2(\text{CH}_3\text{CH}_2\text{O})_2$ .

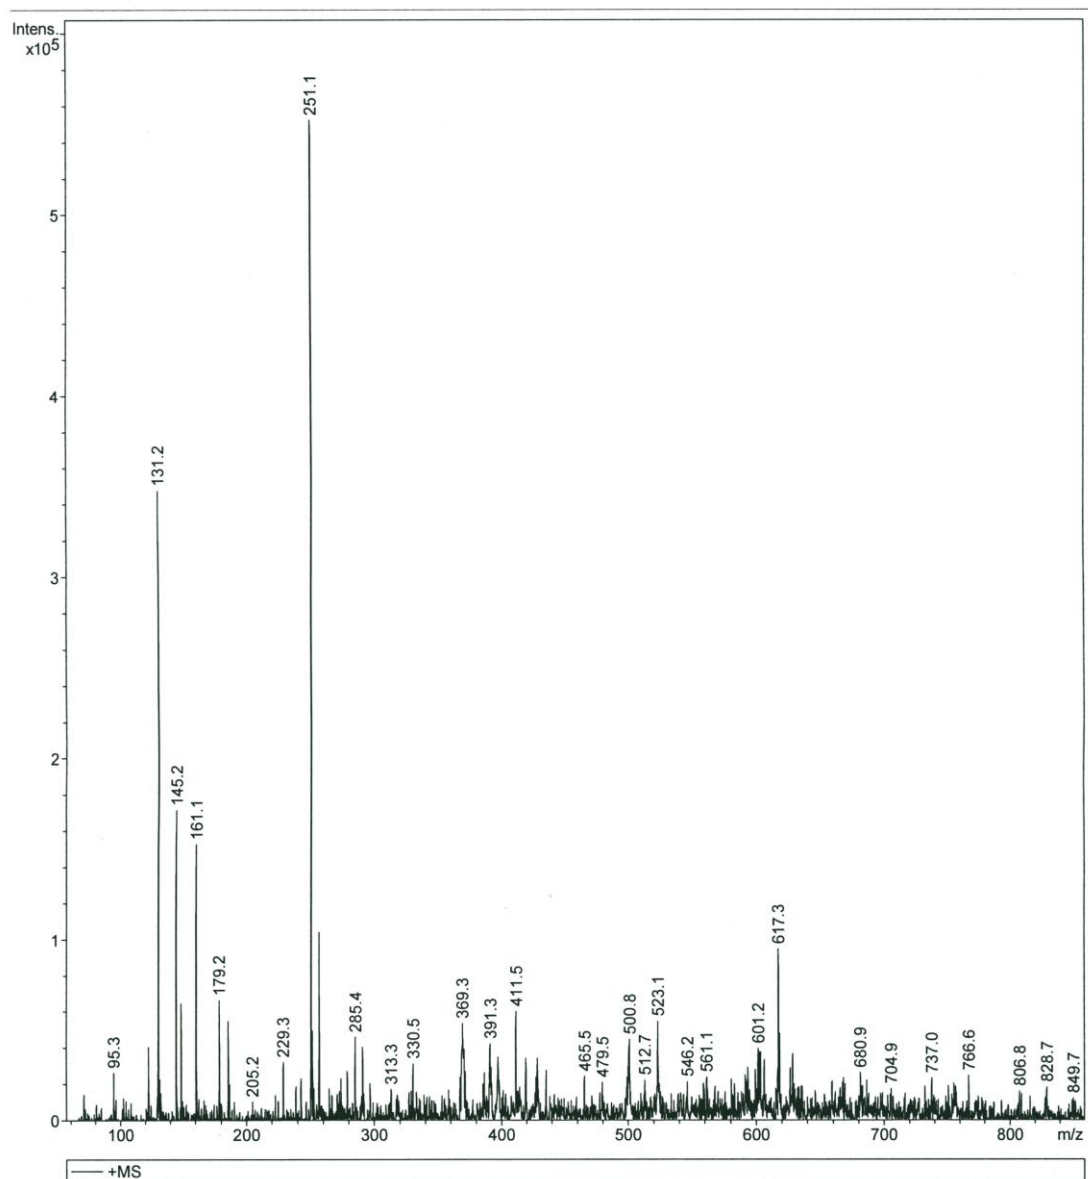

Electrospray ionization (ESI) mass spectrum of Al-(L)<sub>2</sub>-(CH<sub>3</sub>O)<sub>2</sub>.

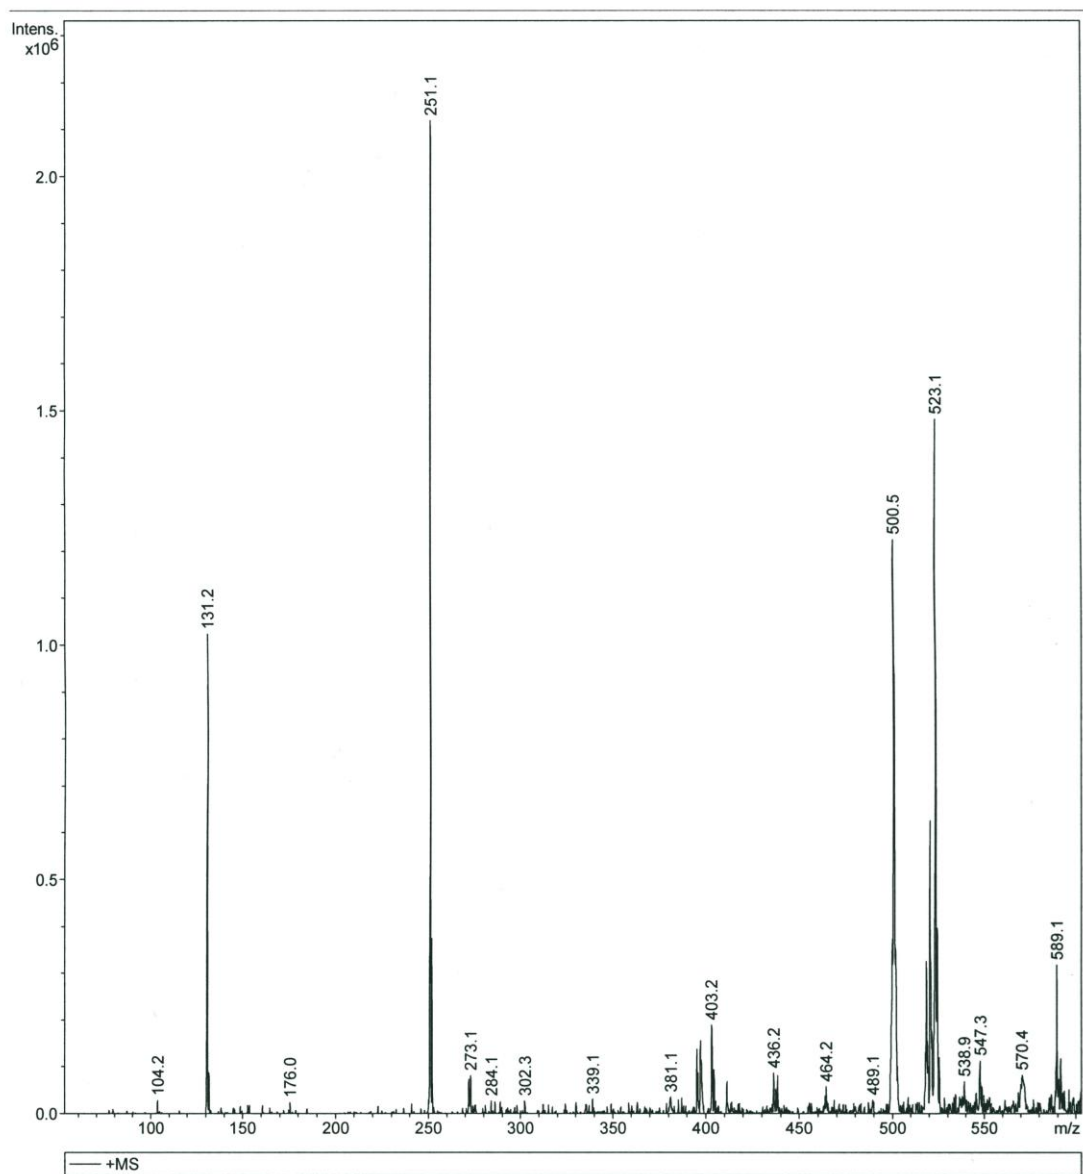

## Theoretical modeling

The geometry optimizations were carried out in vacuum using the hybrid density functional Becke-3-Lee-Yang-Parr (B3LYP) potential in conjunction with a 6-31G\* basis set for the H, C, N, O atoms, and a LANL2DZ effective core potential (ECP) basis set for the Al atom. All the calculation implemented in GAUSSIAN 98 software package.<sup>1</sup> Frequency calculations were also implemented for the optimized structure to ensure that the optimized structure was the one which has the lowest energy.

---

(1) M. J. Frisch, G. W. Trucks, H. B. Schlegel, G. E. Scuseria, M. A. Robb, J. R. Cheeseman, V. G. Zakrzewski, J. A. Montgomery, Jr., R. E. Stratmann, J. C. Burant, S. Dapprich, J. M. Millam, A. D. Daniels, K. N. Kudin, M. C. Strain, O. Farkas, J. Tomasi, V. Barone, M. Cossi, R. Cammi, B. Mennucci, C. Pomelli, C. Adamo, S. Clifford, J. Ochterski, G. A. Petersson, P. Y. Ayala, Q. Cui, K. Morokuma, D. K. Malick, A. D. Rabuck, K. Raghavachari, J. B. Foresman, J. Cioslowski, J. A. Ortiz, A. G. Baboul, B. B. Stefanov, G. Liu, A. Liashenko, P. Piskorz, I. Komaromi, R. Gomperts, R. L. Martin, D. J. Fox, T. Keith, M. A. Al-Laham, C. Y. Peng, A. Nanayakkara, C. Gonzalez, M. Challacombe, P. M. W. Gill, B. Johnson, W. Chen, M. W. Wong, J. L. Andres, C. Gonzalez, M. Head-Gordon, E. S. Replogle and J. A. Pople, *Gaussian 98*, Revision A.9; Gaussian, Inc.: Pittsburgh, PA, 1998.
